## Erratum: Predicting clinically significant prostate cancer using DCE-MRI habitat descriptors

**N. Andres Parra<sup>1</sup>, Hong Lu<sup>1,2</sup>, Qian Li<sup>2</sup>, Radka Stoyanova<sup>3</sup>, Alan Pollack<sup>3</sup>, Sanoj Punnen<sup>4</sup>, Jung Choi<sup>5</sup>, Mahmoud Abdalah<sup>1</sup>, Christopher Lopez<sup>3</sup>, Kenneth Gage<sup>5</sup>, Jong Y. Park<sup>6</sup>, Yamoah Kosj<sup>6,7</sup>, Julio M. Pow-Sang<sup>8</sup>, Robert J. Gillies<sup>1,5</sup> and Yoganand Balagurunathan<sup>1</sup>**

<sup>1</sup> Department of Cancer Physiology, H.L. Moffitt Cancer Center, Tampa, FL, USA

<sup>2</sup> Department of Radiology, Tianjin Medical University Cancer Institute and Hospital, Tianjin, China

<sup>3</sup> Department of Radiation Oncology, University of Miami Miller School of Medicine, Miami, FL, USA

<sup>4</sup> Department of Urology, University of Miami Miller School of Medicine, Miami, FL, USA

<sup>5</sup> Department of Radiology, H.L. Moffitt Cancer Center, Tampa, FL, USA

<sup>6</sup> Department of Cancer Epidemiology, H.L. Moffitt Cancer Center, Tampa, FL, USA

<sup>7</sup> Department of Radiation Oncology, H.L. Moffitt Cancer Center, Tampa, FL, USA

<sup>8</sup> Department of Urology, H.L. Moffitt Cancer Center, Tampa, FL, USA

**Published:** March 12, 2019

**Copyright:** Parra et al. This is an open-access article distributed under the terms of the Creative Commons Attribution License 3.0 (CC BY 3.0), which permits unrestricted use, distribution, and reproduction in any medium, provided the original author and source are credited.

**This article has been corrected:** During production, the author name for this article was given incorrectly. The proper author name is shown below.

**N. Andres Parra**

Original article: Oncotarget. 2018; 9:37125-37136. <https://doi.org/10.18632/oncotarget.26437>
